# Supplementary material
Source: publisher figshare collection journal article supplement (https://frontiersin.figshare.com/ndownloader/files/31903640)
Supplement: Supplementary file [file 31903640]

## Supplementary Figure S1

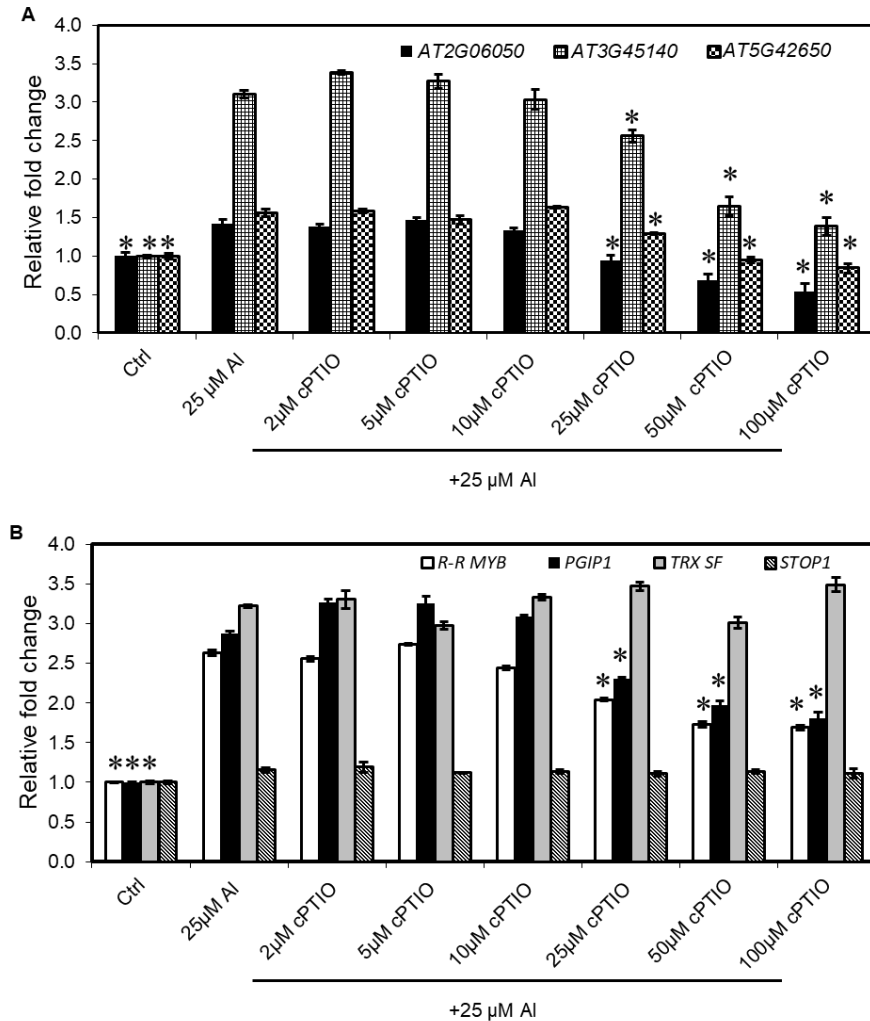

**Fig. S1.** Effect of NO scavenger (cPTIO) on Al stress signaling. (A) Expression analysis of NO marker genes (*AT2G06050*, *AT3G45140*, and *AT5G42650*) in the shoots of Arabidopsis under Al stress. (B) Effect of cPTIO on the expression of genes identified in eGWAS (*NAC27*, *TRX SF*, and *R-R MYB*), *PGIP1*, and *STOP1* in the shoots of Arabidopsis under Al stress. Ten-day-old seedlings were exposed to solutions containing (-Al; Ctrl), (+25  $\mu$ M Al), or (+25  $\mu$ M Al with different cPTIO concentrations) for 24 h. *UBQ1* was used as an internal control. Average values of three biological replicates are presented with standard errors. Relative fold changes from the control (-Al) are shown. An asterisk indicates significant difference from 25  $\mu$ M Al treatment (Student's *t*-test, *P* < 0.05). Primers used for qRT-PCR are listed in Table S2.

## Supplementary Figure S2

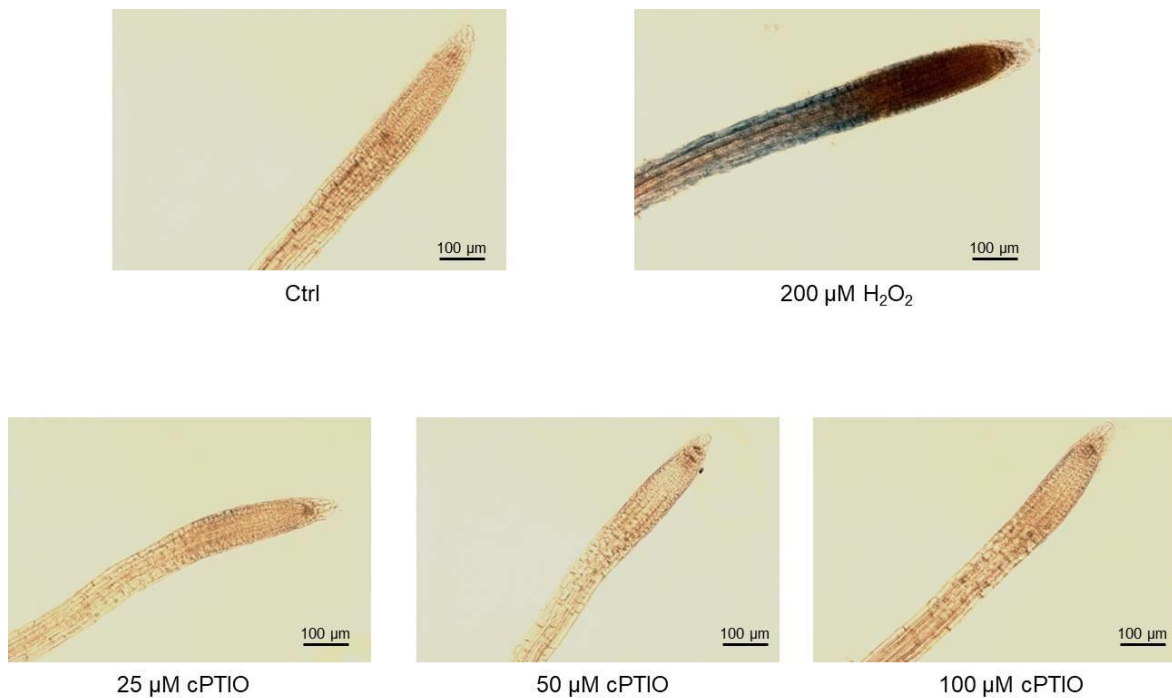

**Fig. S2.** Root tip viability after treatment with NO scavenger (cPTIO). Wild-type *Arabidopsis* seedlings were treated with 25 μM AlCl<sub>3</sub> along with 25, 50, or 100 μM cPTIO, and thereafter were stained with 0.5% Evans blue for 15 min. H<sub>2</sub>O<sub>2</sub> treatment (200 μM; Sadhukhan et al., 2017) was used as a positive control. After repeated washing with water, the seedlings were mounted on glass slides and the roots were visualized with an AxioCam MRc5 microscope (Zeiss, Tokyo, Japan).

## Supplementary Figure S3

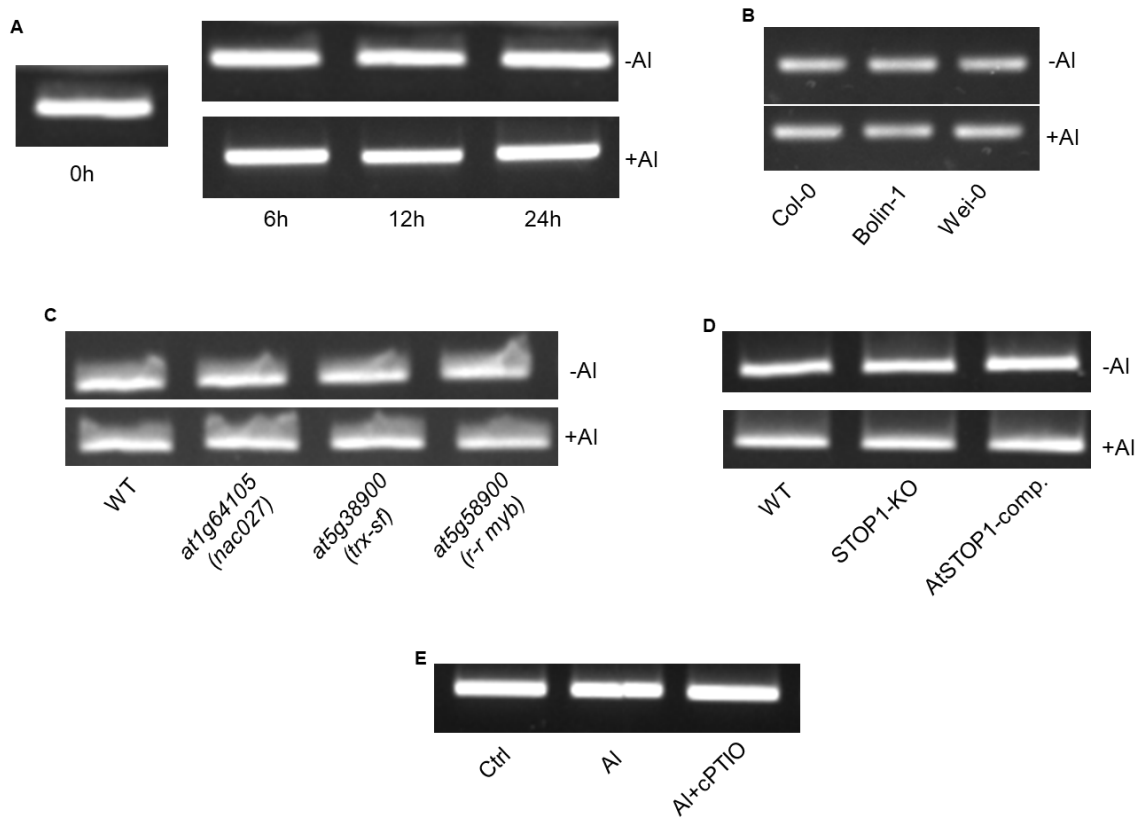

**Fig. S3.** Semi-quantitative PCR for expression of internal standard (*UBQ1*; *AT3G52590*) used in this study to normalize the gene of interest in qRT-PCR. (A) *UBQ1* expression in the shoots of Col-0 under control (-Al) or 25  $\mu$ M  $AlCl_3$  (+Al) treatment at different time points. (B) Expression of *UBQ1* under control (-Al) or 25  $\mu$ M  $AlCl_3$  (+Al) treatment for 24 h in the shoots of Col-0 along with 2 accessions i.e. Bolin-1 (shows higher expression of *PGIP1*) and Wei-0 (shows lower expression of *PGIP1*) among the 83 used in the eGWAS. (C) Expression of *UBQ1* under control and 25  $\mu$ M Al treatment for 24 h in the shoot of wild-type (WT, Col-0) and T-DNA insertion mutants of genes shows significant reductions of *PGIP1* expression. (D) Expression of *UBQ1* under control (-Al) or 25  $\mu$ M  $AlCl_3$  (+Al) treatment for 24 h in the shoots of WT, *STOP1-KO* and *AtSTOP1-complemented* line. (E) Expression of *UBQ1* in the shoot of Col-0 treated with solutions containing (-Al; Ctrl), (+25  $\mu$ M Al), or (+25  $\mu$ M Al with 50  $\mu$ M cPTIO; NO scavenger) for 24 h. PCR products were separated by 3% agarose gel electrophoresis and visualized with GelRed staining.

## Supplementary Figure S4

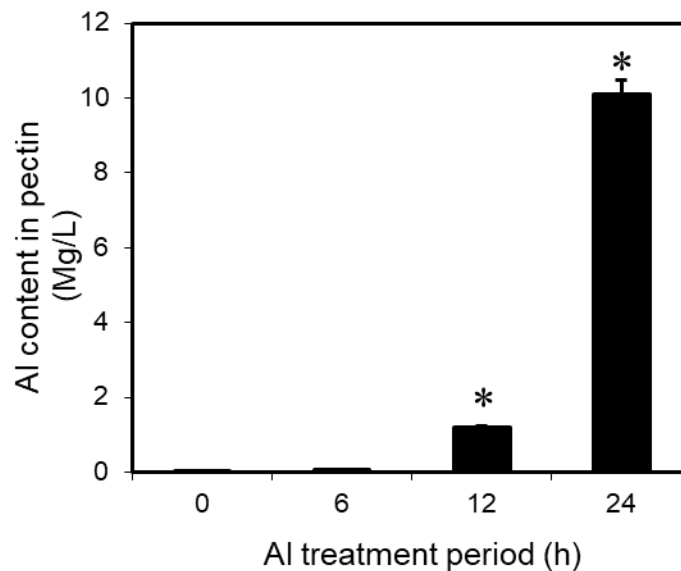

**Fig. S4.** Al content in the shoot cell wall pectin. Al content in pectin under Al stress at different time points of treatment are shown. The shoots were excised from 10-day-old approximately 500 seedlings treated with either 0 or 25  $\mu\text{M}$   $\text{AlCl}_3$  for 0, 6, 12, and 24 h. Pectin was isolated and prepared to measure Al accumulation by ICP-MS. Average data of three replicates are presented with standard errors. An asterisk indicates significant difference from 0 h (Student's *t*-test,  $P < 0.05$ ).

## Supplementary Figure S5

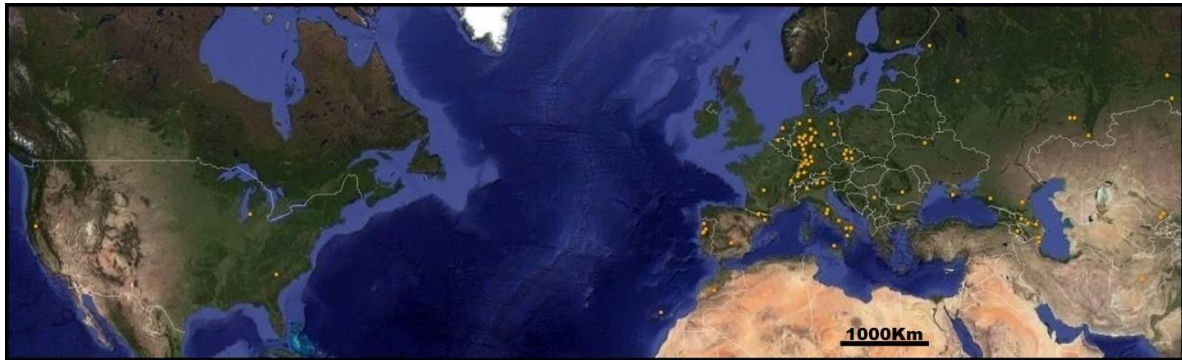

**Fig. S5.** Geographical distribution of *Arabidopsis thaliana* accessions used in this study. The origins of accessions are indicated as yellow dots and detailed in Table S4. Briefly, the information of accessions retrieved from 1001 Genomes database was geographically pinpointed (Atanasov et al., 2016) by using Google Earth (<https://www.google.com/earth/>).

## Supplementary Figure S6

| Locus     | GO term                                                                                                                                                                                                                                                                                                                                                                                               | Locus     | GO term                                                                                                                                                                                                                                                                                                                                                    |
|-----------|-------------------------------------------------------------------------------------------------------------------------------------------------------------------------------------------------------------------------------------------------------------------------------------------------------------------------------------------------------------------------------------------------------|-----------|------------------------------------------------------------------------------------------------------------------------------------------------------------------------------------------------------------------------------------------------------------------------------------------------------------------------------------------------------------|
| AT1G10540 | transmembrane transporter activity<br>transmembrane transport<br>nucleus<br>plasmodesma<br>transporter activity                                                                                                                                                                                                                                                                                       | AT5G15300 | chloroplast RNA modification<br>chloroplast<br>nucleus                                                                                                                                                                                                                                                                                                     |
| AT1G62050 | cytoplasm<br>apoplast<br>negative regulation of nitrogen compound metabolic process<br>negative regulation of cell cycle<br>tissue development<br>flower development<br>molecular_function_unknown<br>nucleus<br>cell division<br>response to light stimulus<br>cell differentiation<br>meiotic cell cycle process                                                                                    | AT5G26300 | anchored component of membrane<br>extracellular region<br>anchored component of membrane                                                                                                                                                                                                                                                                   |
| AT1G64105 | DNA binding<br>DNA-binding transcription factor activity<br>regulation of transcription, DNA-templated<br>nucleus                                                                                                                                                                                                                                                                                     | AT5G26330 | electron transfer activity<br>anchored component of membrane<br>anchored component of plasma membrane                                                                                                                                                                                                                                                      |
| AT2G18880 | vernalization response<br>cellular response to cold<br>response to cold<br>regulation of gene expression, epigenetic                                                                                                                                                                                                                                                                                  | AT5G37500 | ion transmembrane transport<br>response to jasmonic acid<br>nucleus<br>ion transport<br>response to cold<br>response to water deprivation<br>outward rectifier potassium channel activity<br>voltage-gated potassium channel activity<br>response to calcium ion<br>ion transmembrane transporter activity<br>response to abscisic acid<br>protein binding |
| AT2G21850 | intracellular signal transduction<br>cell differentiation<br>root development<br>tissue development<br>nucleus                                                                                                                                                                                                                                                                                        | AT5G38860 | protein binding<br>protein dimerization activity<br>regulation of transcription, DNA-templated<br>nucleus<br>DNA-binding transcription factor activity                                                                                                                                                                                                     |
| AT2G21950 | protein ubiquitination<br>organelle organization<br>chloroplast                                                                                                                                                                                                                                                                                                                                       | AT5G38900 | chloroplast<br>oxidoreductase activity                                                                                                                                                                                                                                                                                                                     |
| AT3G24480 | root development<br>defense response<br>cell differentiation<br>plant epidermis development<br>plant-type cell wall<br>lipid metabolic process<br>organic hydroxy compound metabolic process<br>extracellular region<br>structural constituent of cell wall<br>phyllome development<br>plasmodesma<br>developmental growth<br>plant-type cell wall organization or biogenesis<br>cell wall biogenesis | AT5G43460 | response to lipid<br>chloroplast<br>molecular_function_unknown<br>hormone-mediated signaling pathway<br>endoplasmic reticulum                                                                                                                                                                                                                              |
|           |                                                                                                                                                                                                                                                                                                                                                                                                       | AT5G50940 | nucleus<br>cytoplasm<br>regulation of gene expression<br>mRNA binding<br>transcription by RNA polymerase II                                                                                                                                                                                                                                                |
|           |                                                                                                                                                                                                                                                                                                                                                                                                       | AT5G58900 | nucleus<br>carbohydrate derivative metabolic process<br>small molecule metabolic process<br>regulation of transcription, DNA-templated<br>response to red light<br>DNA-binding transcription factor activity<br>transcription cis-regulatory region binding                                                                                                |
|           |                                                                                                                                                                                                                                                                                                                                                                                                       | AT5G58910 | hydroquinone:oxygen oxidoreductase activity<br>extracellular region<br>copper ion binding<br>secondary metabolite biosynthetic process<br>oxidoreductase activity                                                                                                                                                                                          |

**Fig. S6.** GO term for the genes in which suggestive SNPs were located from GWAS of *PGIP1* expression. GO annotations of the genes in Table 1 based on Gene Ontology at TAIR. GO terms that may be involved in the regulation of gene expression used for candidate gene selection are shown in red.

## Supplementary Figure S7

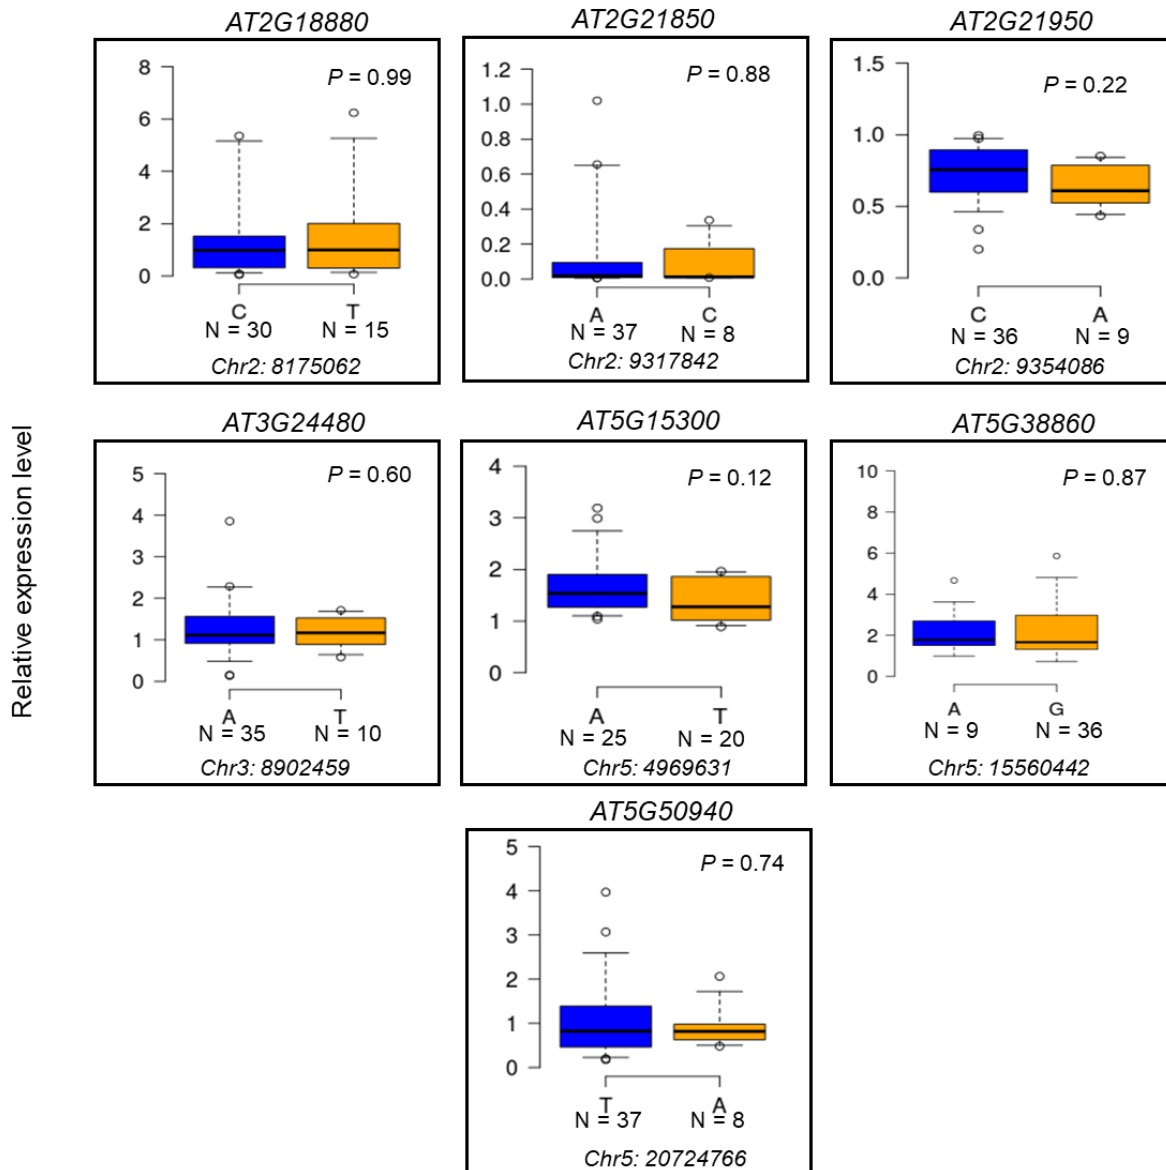

**Fig. S7.** Expression level polymorphisms of the candidate genes (Table 1) identified by eGWAS. Expression of these genes was monitored in 45 randomly chosen accessions among the 83 used in the eGWAS. Accessions are grouped according to SNP alleles at particular physical chromosome positions indicated below each box plot. Number of accessions of each SNP allele is shown under each SNP. Expression levels of each gene are relative to Col-0. *UBQ1* was used as the internal control. Significant difference between the average values of group occurred at  $P < 0.05$  (Student's *t*-test). Primers used for qRT-PCR are listed in Table S2.

# Supplementary Figure S8

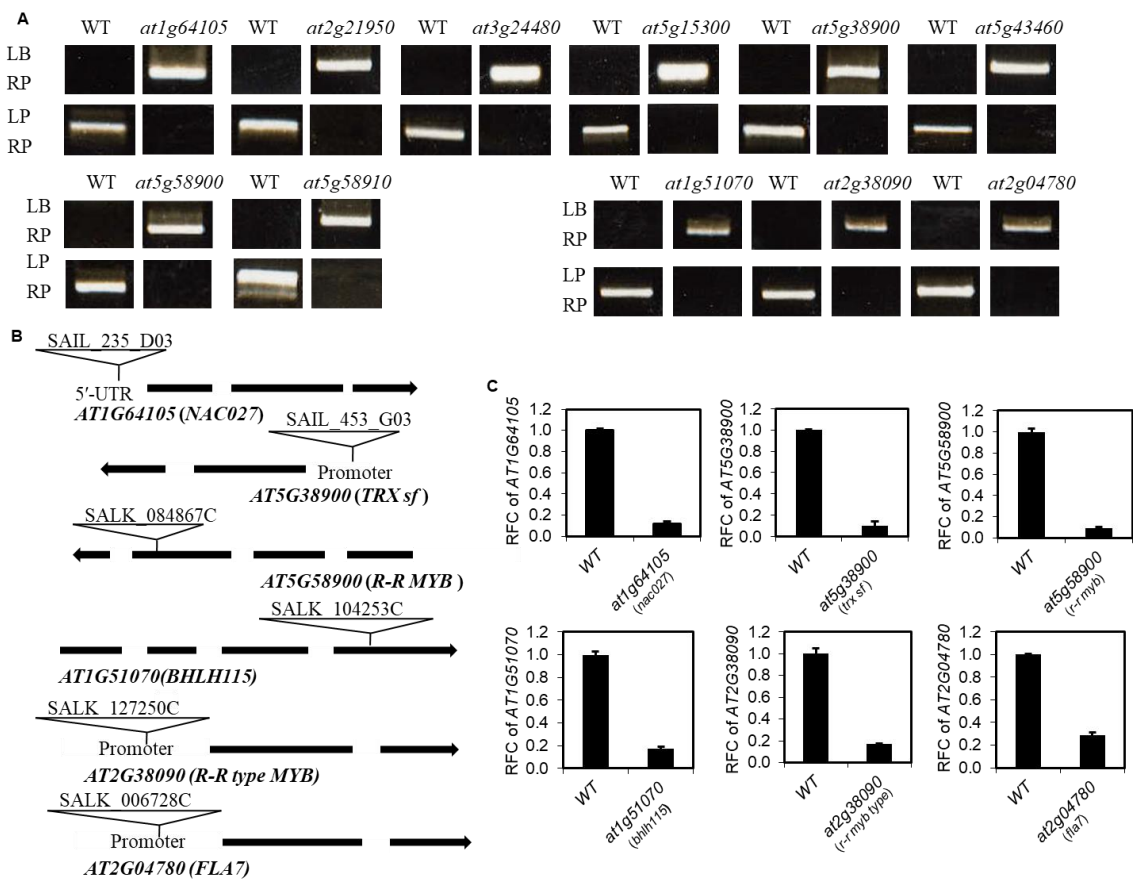

**Fig. S8.** Validation of homozygous T-DNA insertion mutants. (A) T-DNA insertion mutants used in the study were tested for homozygosity using PCR-based method as recommended by SALK T-DNA express. Primers used to check genomic integration of T-DNA are listed in Table S1. RP; reverse genomic primer; LP; forward genomic primer, LB; T-DNA left border primer as recommended by SALK T-DNA express. (B) Positions of insertion of T-DNA in the mutated gene that regulates *PGIP1* expression. Solid lines indicate exon regions of each gene. (C) Expression levels of respective genes regulating *PGIP1* were further checked in the T-DNA insertion knockouts or knockdown mutants. Expression levels are expressed as relative fold changes (RFC) compared to WT. *UBQ1* was used as the internal control. Primers used for qRT-PCR are listed in Table S2.

# Supplementary Figure S9

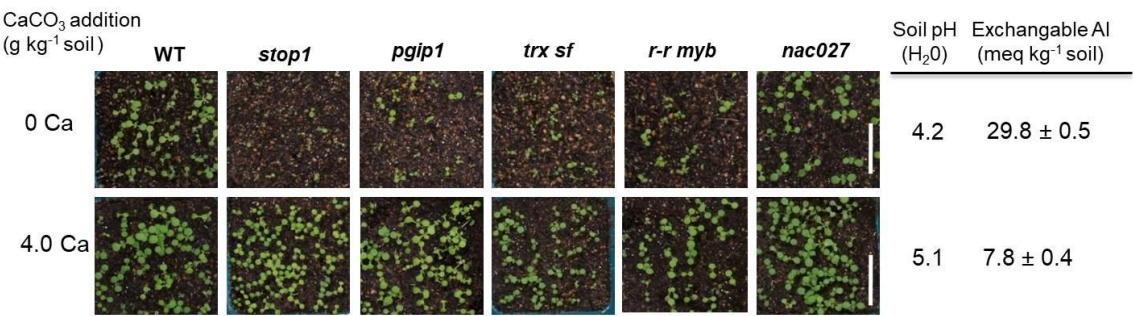

**Fig. S9.** Growth of *Arabidopsis* (Col-0; WT) and T-DNA insertion mutants of the genes regulating *PGIP1* in acidic soil containing exchangeable aluminum. One hundred seeds were sown in acidic soil with different levels of liming (0 and 4.0 g CaCO<sub>3</sub> kg<sup>-1</sup> soil). Figure shows the growth at two weeks and chemical properties of the soil. White bar indicates 1 cm.

## Supplementary Figure S10

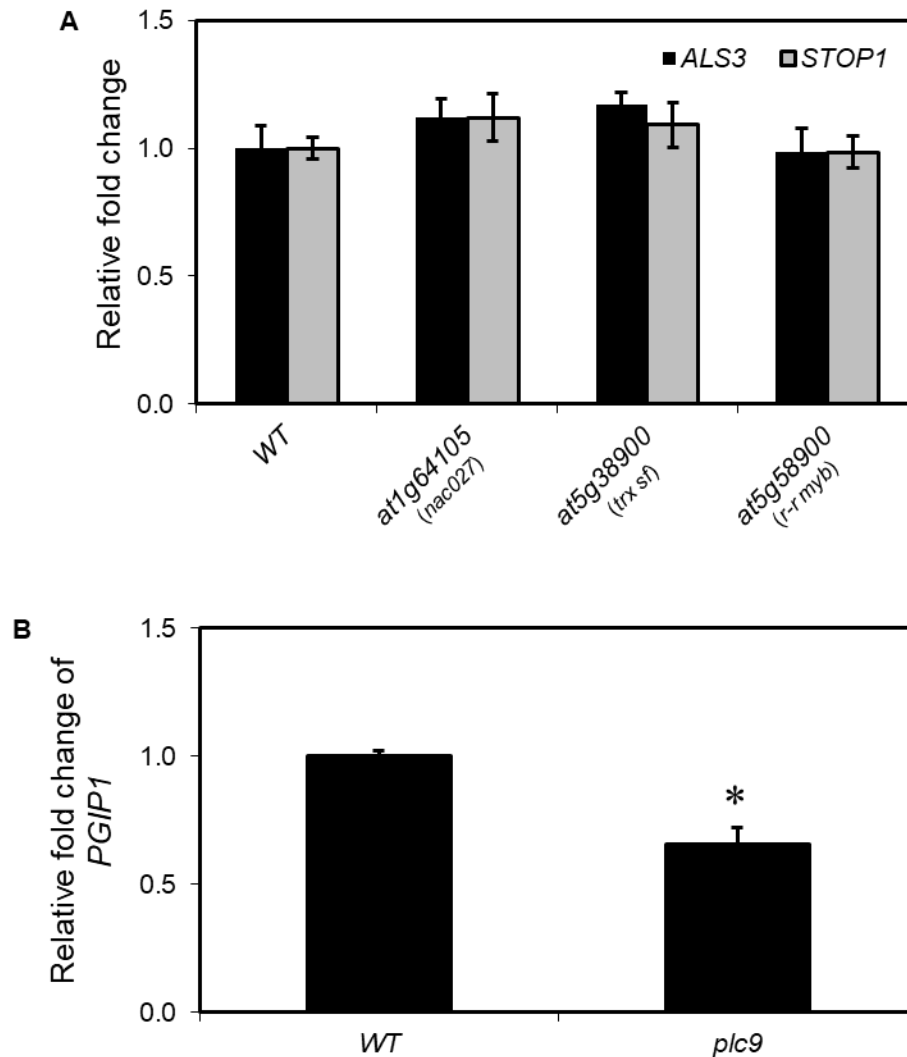

**Fig. S10.** Relationship between STOP1 and the genes detected by eGWAS that regulate the expression of *PGIP1* under Al stress. (A) *ALS3* and *STOP1* expression in the mutants of genes identified by eGWAS for *PGIP1* expression in shoots under Al stress. (B) *PGIP1* expression in the *plc9* (knockout of *PLC9*; Sadhukhan et al., 2020) shoots under Al stress. Ten-day-old seedlings were exposed to 25  $\mu$ M Al for 24 h. *UBQ1* was used as an internal control. Average values of three biological replicates are presented with standard errors. Gene expressions levels are relative to WT. Significant reductions in RFC from the Al-treated WT sample are indicated by asterisks (Student's *t*-test,  $P < 0.05$ ). Primers used for qRT-PCR are listed in Table S2.

## Supplementary Figure S11

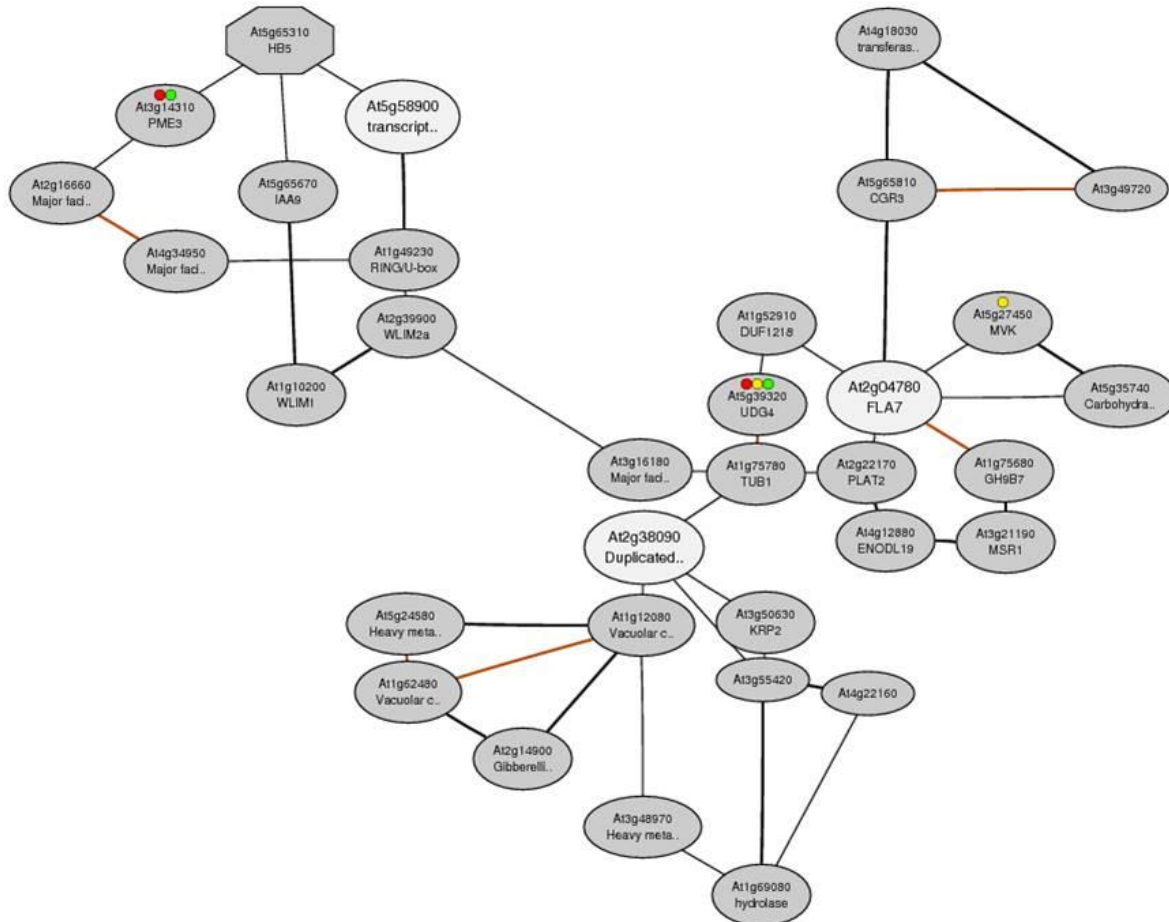

**Fig. S11.** Co-expression network containing the candidate genes that regulate *PGIP1* detected by eGWAS and RNR database. The co-expression network was constructed by ATTED-II using six genes regulating *PGIP1* (*TRX SF*, *NAC027*, *R-R MYB*, *BHLH115*, *AT2G38090*, and *FLA7*) as query genes. White and gray ellipses indicate query genes and added co-expressed genes, respectively. Colored circles indicate the genes involved in enriched biological processes obtained from Kyoto Encyclopedia of Genes and Genomes (KEGG; <https://www.genome.jp/kegg/>), such as pentose and glucuronate interconversions (red; KEGG ID: ath00040), metabolic pathway (green; KEGG ID: ath01100), and amino sugar and nucleotide sugar metabolism (yellow; KEGG ID: ath00520)

## Supplementary Figure S12

| #  | Accession       | -1031 | -1023 | -1010 | -690 | -546 | -211 | 1)-61, 2)-66,<br>3)-59   | -18          | +29* | +45 | NAC027<br>Expression | PGIP1<br>Expression |
|----|-----------------|-------|-------|-------|------|------|------|--------------------------|--------------|------|-----|----------------------|---------------------|
| 1) | <b>Ciste-1</b>  | C     | T     | T     | G    | G    | T    | <b>36bp<br/>Deletion</b> | 2bp Deletion | C    | V   | <b>2.1</b>           | <b>0.76</b>         |
| 2) | <b>TueWa1-2</b> | C     | T     | T     | G    | A    | T    | <b>25bp<br/>Deletion</b> | 2bp Deletion | C    | V   | <b>1.4</b>           | <b>0.30</b>         |
| 3) | <b>Rsch-4</b>   | C     | T     | T     | T    | G    | T    | <b>45bp<br/>Deletion</b> | AA           | C    | L   | <b>2.2</b>           | <b>0.86</b>         |
| 4) | Xan-1           | C     | T     | T     | T    | A    | A    |                          | 2bp Deletion | S    | L   | 1.0                  | 0.13                |
| 5) | Vie-0           | T     | A     | A     | G    | G    | A    |                          | AA           | S    | V   | 0.8                  | 0.14                |
| 6) | El-0            | T     | A     | A     | G    | G    | A    |                          | AA           | S    | V   | 0.7                  | 0.09                |

**Fig. S12.** Promoter region sequence and amino acid polymorphism of the *NAC027*. Approximately 1000 bp upstream from the start codon (indicated by minus) and the exon (indicated by plus) were compared for accessions showing high and low expression of the *NAC027*. Bold indicates polymorphisms associated with high *NAC027* expression and their accessions. The asterisk indicates the position of the SNP detected by GWAS in this study.

## Supplementary Figure S13

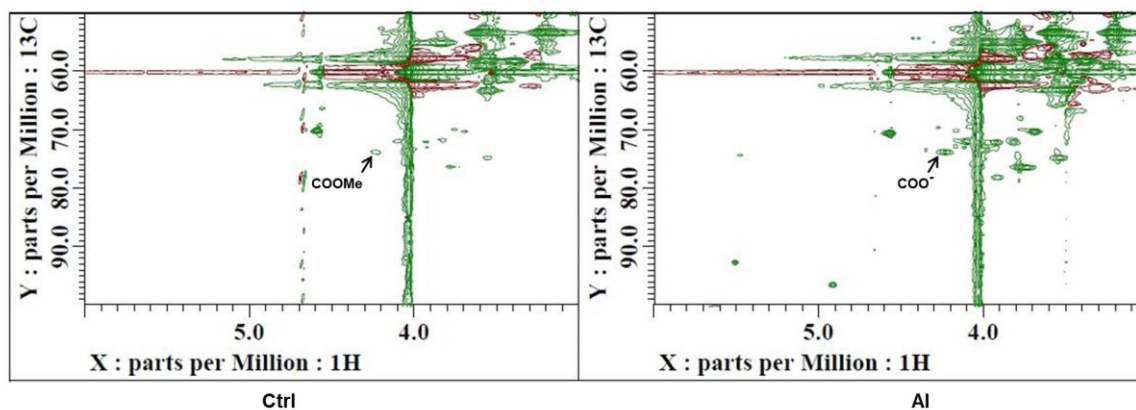

**Fig. S13.** HSQC (heteronuclear single quantum coherence) two dimensional NMR analysis of pectin (CDTA extract) from *Arabidopsis* shoots after exposure of the roots to control (–Al) or Al rhizotoxic (25  $\mu$ M  $\text{AlCl}_3$ ) solutions for 24 h. HSQC spectrum showing pectin methylesterification and demethylesterification under Ctrl and Al stress.

**Table S1.** List of oligonucleotides used to validate T-DNA insertion mutants used in this study

| <b>Sequence (5' to 3')</b> |                 |                                  |                                   |
|----------------------------|-----------------|----------------------------------|-----------------------------------|
| <b>AGI</b>                 | <b>SALK No.</b> | <b>Left Primer (LP) Sequence</b> | <b>Right Primer (RP) Sequence</b> |
| <i>AT1G64105</i>           | SAIL_235_D03    | TTGAATCATCAGAAAGCAAAGAG          | TTATTTGCTTTCAGTCCACCG             |
| <i>AT2G21950</i>           | GABI_707C08     | ACCAAAATCCTTTTCAAACCG            | AGAGCCCTTTTGTGAACAACC             |
| <i>AT3G24480</i>           | GABI_017A08     | CAAATCGGTTTCGATAGCAAAC           | CATTTCATGGTTGTATTCCG              |
| <i>AT5G15300</i>           | SALK_044494C    | GTCCTACCACTAACCCCGTTC            | CTCCACTCAAGCTTCGAACAC             |
| <i>AT5G38900</i>           | SAIL_453_G03    | AATAGGAAAACGCATCAAACG            | TTCTTACAAAGCACCATGGAC             |
| <i>AT5G43460</i>           | SALK_067877C    | TCTGTGATTGATAGCGACGTG            | ATCGGAAAACAATCCGAAATC             |
| <i>AT5G58900</i>           | SALK_084867     | TTGCCGGATGAAGTACTTTTG            | TTCGGACATGGAGGTTATGAG             |
| <i>AT5G58910</i>           | SALK_064093C    | GAGTTTTTCGGGACTTCCAAG            | CAGTAAAGCTCGGCGTTAATG             |
| <i>AT1G51070</i>           | SALK_104253C    | AAGACTTGGGATTTTGTATTGG           | AAGCCATCCACTTCAACACTG             |
| <i>AT2G38090</i>           | SALK_127250C    | CAACATTGTTTTCTATAGCATCG          | TTTCTTCAGCTGTCCATTTGG             |
| <i>AT2G04780</i>           | SALK_113729C    | TTATAATGGTTGCCATTTGCC            | AATCTCCATGGTTATTTCCGG             |

**Table S2.** List of oligonucleotides used in this study for qRT-PCR

| AGI              | Sequence (5' to 3')       |                               |
|------------------|---------------------------|-------------------------------|
|                  | Forward Primer Sequence   | Reverse Primer Sequence       |
| <i>AT1G64105</i> | GGGTGAGGAAATTGGTGGAA      | ACGTCCATTGAAGACTCTCCTG        |
| <i>AT2G21950</i> | CTTAATGCCCTGAGCCAAGA      | CAAAGAAATGCACATGCAGAAG        |
| <i>AT2G21850</i> | TCTGAGGTTATGCCTCTTTGCTT   | AAAACAGTGGCACAGGCACTAC        |
| <i>AT2G18880</i> | GCATCCTGAGATTGGTGGTG      | CAATGCTTCTCATCAGATCTCCTCT     |
| <i>AT3G24480</i> | CGCCACCATCAATCCATTAC      | ATGGCCCTTCAAATTCAGGT          |
| <i>AT5G15300</i> | AACGCTTCATTGGCGAACTA      | CTTCCTATAAAATGTGGTGCTCAGA     |
| <i>AT5G38860</i> | CATTCCCAGAAGAGAATAAGACGA  | CCTGACTCACCGAAAGTAACAAA       |
| <i>AT5G38900</i> | GGAGATTCTCTGTTTCTGTTGTTTG | GCAAGAAGAAGAAGAGTGCTTGA       |
| <i>AT5G43460</i> | CTGTGATTTGATATTGGGGATCTTG | GGTCATGAAATCATTGTTCTGTAGC     |
| <i>AT5G50940</i> | TCTCAGAAAGATTGTGGAGCTCTT  | CCTTGGAGAGGTTGCAGCTA          |
| <i>AT5G58900</i> | AGTGGCGTTCATTCATACGG      | CATTGTGTTTTGGGCGTCA           |
| <i>AT5G58910</i> | GGTGGTTGGACTGCCATAAGA     | GTGGAGGAAGCAATGACTGG          |
| <i>AT1G51070</i> | GCTTAAAGCTGCTGCTTCTCTCT   | TGCAGTGGACTATGTCACCAA         |
| <i>AT2G38090</i> | ACAAGGTGAAGATCTCGGAGAAG   | ATATGCACGCCGATTAAGAGAA        |
| <i>AT2G04780</i> | CTCCGGACAAAAGCTGCTAC      | CTCAATCTGCAAAACCATCTGA        |
| <i>At5g42650</i> | GCTTTTAGGAGCCAAGGGTAAA    | CGAACATGTAGAGCAGCAACAG        |
| <i>AT3G45140</i> | GGCAAGCTCCAATATCTAGAAGGA  | GAACACCCATTCCGGTAACA          |
| <i>At2g06050</i> | GCGGTTCAAGATTGATGGAGA     | CAAACCTCAGAGGCGGGAAAA         |
| <i>PGIP1</i>     | TAAACCAAGCTTATCTCTAGGATTA | CCATCAAATAAAACATTTTGAAAATGTGC |
| <i>ALS3</i>      | TATCGATCCTTGCCGGGACTTCA   | GCTTGTCTTGGCGTTGCTCCTA        |
| <i>UBQ1</i>      | TCGTAAGTACAATCAGGATAAGATG | CACTGAAACAAGAAAAACAAACCT      |
| <i>STOP1</i>     | CCTGGAATGACTGATGGGAGGA    | TCCTGGGCGAGAAACCACA           |

**Table S3.** List of probe sequences used for DNA-protein binding assay

| <b>Probe name</b>               | <b>Probe Sequence (5' to 3')</b> |
|---------------------------------|----------------------------------|
| AT5G06860 (PGIP1)-STOP1bind-FW  | TATAACTTGCACCGGTTATAGCCTAATTAT   |
| AT5G06860 (PGIP1)-STOP1bind-Rv  | ATAATTAGGCTATAACCGGTGCAAGTTATA   |
| AT5G38900 (TRX SF)-STOP1bind-FW | ACCGTCTAGATACGACCTACCGATTTTTTG   |
| AT5G38900 (TRX SF)-STOP1bind-RV | CAAAAAATCGGTAGGTCGTATCTAGACGGT   |
| AT5G06860 (PGIP1)-mutated-FW    | ATAATTAGGCTATAAAAAAAAAAAGTTATA   |
| AT5G06860 (PGIP1)-mutated-Rv    | TATAACTTTTTTTTTTTTATAGCCTAATTAT  |
| AT5G38900 (TRX SF)-mutated-FW   | ACCGTCTAGATTTTTTTTTTTTGATTTTTTG  |
| AT5G38900 (TRX SF)-mutated-RV   | CAAAAAATCAAAAAAAAAAATCTAGACGGT   |

**Table S4.** Expression levels of *PGIP1* in *Arabidopsis thaliana* accessions used in this study

| Accession name | Fold<br>change<br>in<br><i>PGIP1</i><br>(-Log <sub>2</sub> ) | Location                      | Country        |
|----------------|--------------------------------------------------------------|-------------------------------|----------------|
| Go-0           | -0.099                                                       | Goettingen                    | Germany        |
| Fr-4           | -0.193                                                       | Frankfurt                     | Germany        |
| Rsch-4         | -0.223                                                       | Rschew/Starize                | Russia         |
| Ei-2           | -0.285                                                       | Eifel                         | Germany        |
| Ciste-1        | -0.400                                                       | Cisterna de Latina            | Italy          |
| Voeran-1       | -0.492                                                       | Voeran, South Tyrolia         | Italy          |
| Copac-1        | -0.548                                                       | Copac                         | Serbia         |
| Db-0           | -0.550                                                       | Dombachtal/Ts.                | Germany        |
| Nd-0           | -0.680                                                       | Niederzenz                    | Germany        |
| Hn-0           | -0.725                                                       | Hennetalsperre                | Germany        |
| Ey15-2         | -0.834                                                       | Eyach                         | Germany        |
| Can-0          | -0.873                                                       | Canary Islands                | Spain          |
| Koch-1         | -0.897                                                       | Zhytomir Oblast; Radomyshlsky | Ukraine        |
| An-1           | -0.902                                                       | Antwerpen                     | Belgium        |
| In-0           | -0.930                                                       | Innsbruck                     | Austria        |
| Ag-0           | -1.044                                                       | Argentat                      | France         |
| Apost-1        | -1.077                                                       | Sant Piedro Apostolo          | Italy          |
| Bu-0           | -1.099                                                       | Burghaun/Rhon                 | Germany        |
| Bay-0          | -1.111                                                       | Bayreuth                      | Germany        |
| Timpo-1        | -1.114                                                       | Timpo Ulivi, Cosenza          | Italy          |
| Co-2           | -1.136                                                       | Coimbra                       | Portugal       |
| Angel-1        | -1.136                                                       | Sant Angelo                   | Italy          |
| Fei-0          | -1.175                                                       | Santa Maria da Feira village  | Portugal       |
| Blh-2          | -1.214                                                       | Bulhary                       | Czech Republic |
| En-1           | -1.245                                                       | Enkheim/Frankfurt             | Germany        |
| Dra-2          | -1.248                                                       | Drahonin                      | Czech Republic |
| Br-0           | -1.333                                                       | Brunn                         | Czech Republic |
| TueWal-2       | -1.333                                                       | Tubingen - Wanne              | Germany        |
| Aitba-2        | -1.336                                                       | Ait Barka, Marrakech          | Morocco        |
| Krazo-2        | -1.336                                                       | Krasnaja                      | Russia         |
| Yeg-1          | -1.381                                                       | Yeghegis                      | Armenia        |
| Lag2.2         | -1.400                                                       | Lagodechi                     | Georgia        |
| Dra-1          | -1.427                                                       | Drahonin                      | Czech Republic |
| Pla-0          | -1.458                                                       | Playa de Aro                  | Spain          |
| Dr-0           | -1.470                                                       | Dresden                       | Germany        |
| Pna-10         | -1.486                                                       | Benton Harbor, Midwest        | USA            |
| Galdo-1        | -1.502                                                       | Galdo                         | Italy          |
| Chi-1          | -1.604                                                       | Chisdra                       | Russia         |
| Nok-3          | -1.617                                                       | Noordwijk                     | Netherlands    |
| Fi-1           | -1.662                                                       | Frickhofen                    | Germany        |
| Bsch-2         | -1.737                                                       | Buchschlag/Frankfurt am Main  | Germany        |
| Jablo-1        | -1.806                                                       | Jablokovec                    | Bulgaria       |
| Kastel-1       | -1.806                                                       | Republic of Crimea            | Ukraine        |
| Bd-0           | -1.831                                                       | Berlin/Dahlem                 | Germany        |
| HKT2.4         | -1.831                                                       | Heiligkreuztal                | Germany        |

|               |        |                                  |                |
|---------------|--------|----------------------------------|----------------|
| Shigu-1       | -1.842 | Aleksandrovka                    | Russia         |
| Hs-0          | -1.847 | Hannover/Stroehen                | Germany        |
| Shigu-2       | -1.878 | Aleksandrovka                    | Russia         |
| Istisu-1      | -1.921 | Istisu                           | Azerbaijan     |
| Es-0          | -1.927 | Espoo                            | Finland        |
| Bs-1          | -1.932 | Basel                            | Switzerland    |
| Sij2          | -1.938 | Sidzhak                          | Uzbekistan     |
| Sha           | -1.943 | Shirdagh                         | Afghanistan    |
| Koz2          | -1.983 | Altaijskij Kraj                  | Russia         |
| Co-3          | -2.071 | Coimbra                          | Portugal       |
| Bs-2          | -2.077 | Basel                            | Switzerland    |
| Ws-0          | -2.114 | Wassilewskija                    | Russia         |
| Ciste-2       | -2.171 | Cisterna de Latina               | Italy          |
| Vash-1        | -2.171 | Vashlovani Reserve               | Georgia        |
| Kidr-1        | -2.178 | Kidzjasovo, Orenburgskaja Oblast | Russia         |
| Rue3-1-31     | -2.198 | Rubgarten                        | Germany        |
| Tuescha9      | -2.238 | Tübingen - Schaal                | Germany        |
| Wei-0         | -2.279 | Weiningen                        | Switzerland    |
| Kly4          | -2.286 | Altajski kraj                    | Russia         |
| TueV13        | -2.322 | Tubingen - Volksbank             | Germany        |
| Ge-0          | -2.427 | Geneva                           | Switzerland    |
| Buckhorn Pass | -2.565 | Buckhorn Pass                    | USA            |
| Omo-2-3       | -2.626 | Ostra                            | Sweden         |
| Bor-4         | -2.644 | Borky                            | Czech Republic |
| Sij1          | -2.727 | Sidzhak                          | Uzbekistan     |
| Se-0          | -2.747 | San Eleno                        | Spain          |
| Xan-1         | -2.796 | Xanbulan                         | Azerbaijan     |
| Mz-0          | -2.816 | Merzhausen/Ts.                   | Germany        |
| Pa-1          | -2.837 | Palermo                          | Italy          |
| Vie-0         | -3.000 | Near Vielha                      | Spain          |
| Rovero-1      | -3.083 | Rovero d. Luna                   | Italy          |
| Valsi-1       | -3.211 | Valsinnica                       | Italy          |
| Gie-0         | -3.366 | Gieben                           | Germany        |
| El-0          | -3.458 | Ellershausen                     | Germany        |
| Lerik1-3      | -5.158 | Lankaran and Lerik               | Azerbaijan     |
| Star-8        | -8.381 | Starzach                         | Germany        |
| Col-0         | 0.000  | Columbia                         | USA            |
| Bolin-1       | 0.034  | Bolintin Vale                    | Romania        |
